# Supplementary material
Source: publisher site journal article supplement (https://www.dovepress.com/article/565012)
Supplement: Supplementary file 1 [file 565012%20Supplementary%20Material_for%20corrections_1.docx]

**Supplementary Material**

**The RECORD statement – checklist of items, extended from the STROBE statement, that should be reported in observational studies using routinely collected health data.**

|  | **Item No.** | **STROBE items** | **Location in manuscript where items are reported** | **RECORD items** | **Location in manuscript where items are reported** |
| --- | --- | --- | --- | --- | --- |
| **Title and abstract** | | | | | |
|  | 1 | (a) Indicate the study’s design with a commonly used term in the title or the abstract (b) Provide in the abstract an informative and balanced summary of what was done and what was found | (a): Page 4, “This retrospective study included....”  (b): Page 4 | RECORD 1.1: The type of data used should be specified in the title or abstract. When possible, the name of the databases used should be included.  RECORD 1.2: If applicable, the geographic region and timeframe within which the study took place should be reported in the title or abstract.  RECORD 1.3: If linkage between databases was conducted for the study, this should be clearly stated in the title or abstract. | 1.1: Page 4, “Methods”  1.2: Page 4, “Methods”  1.3: Not applicable |
| **Introduction** | | | | | |
| Background rationale | 2 | Explain the scientific background and rationale for the investigation being reported | Page 5,6 |  |  |
| Objectives | 3 | State specific objectives, including any prespecified hypotheses | Page 7, “We hypothesized that higher..” |  |  |
| **Methods** | | | | | |
| Study Design | 4 | Present key elements of study design early in the paper | Page 7, “This retrospective study...” |  |  |
| Setting | 5 | Describe the setting, locations, and relevant dates, including periods of recruitment, exposure, follow-up, and data collection | Page 7, “ at the Affiliated Hospital of Nanjing University of Chinese Medicine from July 2019 to December 2021...”; “ followed up at 8 weeks and ... followed up at 12 weeks...” |  |  |
| Participants | 6 | *(a) Cohort study* - Give the eligibility criteria, and the sources and methods of selection of participants. Describe methods of follow-up  *Case-control study* - Give the eligibility criteria, and the sources and methods of case ascertainment and control selection. Give the rationale for the choice of cases and controls  *Cross-sectional study* - Give the eligibility criteria, and the sources and methods of selection of participants  *(b) Cohort study* - For matched studies, give matching criteria and number of exposed and unexposed  *Case-control study* - For matched studies, give matching criteria and the number of controls per case | 1. Page 7, Patients with Crohn's disease (CD) ... were retrospectively included. Exclusion criteria....”; “ followed up at 12 weeks in the outpatient clinic” 2. Not applicable. | RECORD 6.1: The methods of study population selection (such as codes or algorithms used to identify subjects) should be listed in detail. If this is not possible, an explanation should be provided.  RECORD 6.2: Any validation studies of the codes or algorithms used to select the population should be referenced. If validation was conducted for this study and not published elsewhere, detailed methods and results should be provided.  RECORD 6.3: If the study involved linkage of databases, consider use of a flow diagram or other graphical display to demonstrate the data linkage process, including the number of individuals with linked data at each stage. | 6.1: Page 7, “Patients with Crohn's disease (CD) who received biological therapy at the Affiliated Hospital of Nanjing University of Chinese Medicine from July 2019 to December 2021 were included.”  6.2: Not applicable.  6.3: Not applicable. |
| Variables | 7 | Clearly define all outcomes, exposures, predictors, potential confounders, and effect modifiers. Give diagnostic criteria, if applicable. | Page 8, 9, “Biological agent response and non-response were defined...”; “PhenoAge was calculated based on...”. | RECORD 7.1: A complete list of codes and algorithms used to classify exposures, outcomes, confounders, and effect modifiers should be provided. If these cannot be reported, an explanation should be provided. | “fecal calprotectin < 250 μg/g or a reduction of > 50% from baseline levels.”;  A formula was shown for biological age calculation. |
| Data sources/ measurement | 8 | For each variable of interest, give sources of data and details of methods of assessment (measurement).  Describe comparability of assessment methods if there is more than one group | Page 7, 8, “Data collection and definition of loss to response”; “Phenotypic age calculation” |  |  |
| Bias | 9 | Describe any efforts to address potential sources of bias | Page 9, “multivariate logistic regression analyses were used...” |  |  |
| Study size | 10 | Explain how the study size was arrived at | Page, 9, 10,“Using PASS11 software, we estimated the sample size...” |  |  |
| Quantitative variables | 11 | Explain how quantitative variables were handled in the analyses. If applicable, describe which groupings were chosen, and why | Page 9, “ between quantitative data of PhenoAge, the age gap...” |  |  |
| Statistical methods | 12 | (a) Describe all statistical methods, including those used to control for confounding  (b) Describe any methods used to examine subgroups and interactions  (c) Explain how missing data were addressed  (d) *Cohort study* - If applicable, explain how loss to follow-up was addressed  *Case-control study* - If applicable, explain how matching of cases and controls was addressed  *Cross-sectional study* - If applicable, describe analytical methods taking account of sampling strategy  (e) Describe any sensitivity analyses | (a): Page 9, “Statistical analyses....”  (b): Not applicable  (c): Not applicable  (d): Not applicable  (e): Not applicable |  |  |
| Data access and cleaning methods |  | .. |  | RECORD 12.1: Authors should describe the extent to which the investigators had access to the database population used to create the study population.  RECORD 12.2: Authors should provide information on the data cleaning methods used in the study. | 12.1: page 8, “For this study, we were granted access to all data elements necessary to create the study cohort ....”  12.2 Not applicable |
| Linkage |  | .. |  | RECORD 12.3: State whether the study included person-level, institutional-level, or other data linkage across two or more databases. The methods of linkage and methods of linkage quality evaluation should be provided. | Not applicable |
| **Results** | | | | | |
| Participants | 13 | (a) Report the numbers of individuals at each stage of the study (*e.g.*, numbers potentially eligible, examined for eligibility, confirmed eligible, included in the study, completing follow-up, and analysed)  (b) Give reasons for non-participation at each stage.  (c) Consider use of a flow diagram | (a) Page 10, “81 patients were followed up at 8 weeks and 76 patients were followed up at 12 weeks ...”  (b) Figure 1  (c) figure 1 | RECORD 13.1: Describe in detail the selection of the persons included in the study (*i.e.,* study population selection) including filtering based on data quality, data availability and linkage. The selection of included persons can be described in the text and/or by means of the study flow diagram. | 13.1, Page 7, and figure 1 |
| Descriptive data | 14 | (a) Give characteristics of study participants (*e.g.*, demographic, clinical, social) and information on exposures and potential confounders  (b) Indicate the number of participants with missing data for each variable of interest  (c) *Cohort study* - summarise follow-up time (*e.g.*, average and total amount) | (a) Page 10, “Patients with LOR had low serum albumin levels...”  (b) not applicable  (c) Page 10, “81 patients were followed up at 8 weeks and 76 patients were followed up at 12 weeks” |  |  |
| Outcome data | 15 | *Cohort study* - Report numbers of outcome events or summary measures over time  *Case-control study* - Report numbers in each exposure category, or summary measures of exposure  *Cross-sectional study* - Report numbers of outcome events or summary measures | Page 10, “33 patients had LOR at 8 weeks and 34 patients had LOR at 12 weeks.” |  |  |
| Main results | 16 | (a) Give unadjusted estimates and, if applicable, confounder-adjusted estimates and their precision (e.g., 95% confidence interval). Make clear which confounders were adjusted for and why they were included  (b) Report category boundaries when continuous variables were categorized  (c) If relevant, consider translating estimates of relative risk into absolute risk for a meaningful time period | (a): Page 10, “ Univariate analysis showed...”; “ Multivariable regression analyses...after controlling for sex, L1 type, perianal lesions”  (b): Page 8, “fecal calprotectin < 250 μg/g”  (c): Not applicable |  |  |
| Other analyses | 17 | Report other analyses done—e.g., analyses of subgroups and interactions, and sensitivity analyses | Not applicable |  |  |
| **Discussion** | | | | | |
| Key results | 18 | Summarise key results with reference to study objectives | Page 12, “Our study presents the association...” |  |  |
| Limitations | 19 | Discuss limitations of the study, taking into account sources of potential bias or imprecision. Discuss both direction and magnitude of any potential bias | Page 14, “This study has several limitations...” | RECORD 19.1: Discuss the implications of using data that were not created or collected to answer the specific research question(s). Include discussion of misclassification bias, unmeasured confounding, missing data, and changing eligibility over time, as they pertain to the study being reported. | Page 14, “several potentially significant confounding variables ...**were not systematically controlled** in the analyses” |
| Interpretation | 20 | Give a cautious overall interpretation of results considering objectives, limitations, multiplicity of analyses, results from similar studies, and other relevant evidence | Page 11-15 |  |  |
| Generalisability | 21 | Discuss the generalisability (external validity) of the study results | Page 14, “limits the statistical power and generalizability of the findings” |  |  |
| **Other Information** | | | | | |
| Funding | 22 | Give the source of funding and the role of the funders for the present study and, if applicable, for the original study on which the present article is based | Page 2, “This study was funded by...” |  |  |
| Accessibility of protocol, raw data, and programming code |  | .. | Page 2, “All the data generated or analyzed during this study are available from the corresponding author upon reasonable request.” | RECORD 22.1: Authors should provide information on how to access any supplemental information such as the study protocol, raw data, or programming code. | Not applicable |

RECORD checklist adapted from Benchimol EI, Smeeth L, Guttmann A, Harron K, Moher D, Petersen I, Sørensen HT, von Elm E, Langan SM, the RECORD Working Committee. The REporting of studies Conducted using Observational Routinely-collected health Data (RECORD) Statement. *PLoS Med* 2015;12(10): e1001885. doi:10.137/journal.pmed.100185 Creative Commons.
